# Supplementary material for: High school science fair and research integrity
Source: PLoS One. 2017 Mar 22;12(3):e0174252. doi: 10.1371/journal.pone.0174252 (PMC5362261; doi:10.1371/journal.pone.0174252)
Supplement: S1 Dataset — (XLSX) [file pone.0174252.s003.xlsx]

## Sheet: GrinnellSURFSummer20_DATA_LABEL
		SUPPLEMENTAL TABLE 1: DATA SET FOR ANALYSIS
Survey Identifier	Status	2. Gender?	2. Gender?	3. When you were in high school, did you carry out a science fair project?	3. When you were in high school, did you carry out a science fair project?	4a. What was the highest 2 - GRADe in which you did so?	4b. Did you carry out science fair more than once?	5. Was your science fair project Team or Individual?	5. Was your science fair project Team or Individual?	6. Was the science fair project required by your school?	6. Was the science fair project required by your school?	6. Was the science fair project required by your school?	11. From whom do you think it would be reasonable to receive help on a science fair project? Check all that apply (choice=1. Parents)	11. From whom do you think it would be reasonable to receive help on a science fair project? Check all that apply (choice=2. Siblings)	11. From whom do you think it would be reasonable to receive help on a science fair project? Check all that apply (choice=3. Other family members (uncles, cousins, etc.))	11. From whom do you think it would be reasonable to receive help on a science fair project? Check all that apply (choice=4. Teachers)	11. From whom do you think it would be reasonable to receive help on a science fair project? Check all that apply (choice=5. Other students)	11. From whom do you think it would be reasonable to receive help on a science fair project? Check all that apply (choice=6. Scientists)	11. From whom do you think it would be reasonable to receive help on a science fair project? Check all that apply (choice=7. A paid mentor)	11. From whom do you think it would be reasonable to receive help on a science fair project? Check all that apply (choice=8. Articles on the Internet)	11. From whom do you think it would be reasonable to receive help on a science fair project? Check all that apply (choice=9. Articles in books or magazines)	12. Who actually helped you?Check all that apply (choice=1. Parents)	12. Who actually helped you?Check all that apply (choice=2. Siblings)	12. Who actually helped you?Check all that apply (choice=3. Other family members (uncles, cousins, etc.))	12. Who actually helped you?Check all that apply (choice=4. Teachers)	12. Who actually helped you?Check all that apply (choice=5. Other students)	12. Who actually helped you?Check all that apply (choice=6. Scientists)	12. Who actually helped you?Check all that apply (choice=7. A paid mentor)	12. Who actually helped you?Check all that apply (choice=8. Articles on the Internet)	12. Who actually helped you?Check all that apply (choice=9. Articles in books or magazines)	13. What kind of help on a science fair project do you think would be reasonable to expect from others?Check all that apply (choice=1. Being given the main idea)	13. What kind of help on a science fair project do you think would be reasonable to expect from others?Check all that apply (choice=2. Development of the idea)	13. What kind of help on a science fair project do you think would be reasonable to expect from others?Check all that apply (choice=3. Gathering background research information, or finding a research site or participants)	13. What kind of help on a science fair project do you think would be reasonable to expect from others?Check all that apply (choice=4. Performing the experiments)	13. What kind of help on a science fair project do you think would be reasonable to expect from others?Check all that apply (choice=5. Writing the report)	13. What kind of help on a science fair project do you think would be reasonable to expect from others?Check all that apply (choice=6. Fine tuning the report after it is written)	13. What kind of help on a science fair project do you think would be reasonable to expect from others?Check all that apply (choice=7. Designing the poster board and presentation)	13. What kind of help on a science fair project do you think would be reasonable to expect from others?Check all that apply (choice=8. Producing charts or graphs)	13. What kind of help on a science fair project do you think would be reasonable to expect from others?Check all that apply (choice=9. Coaching for the interview with judges)	13. What kind of help on a science fair project do you think would be reasonable to expect from others?Check all that apply (choice=10. Copying the project from someone else)	14. What kind of help did you actually receive?Check all that apply (choice=1. Being given the main idea)	14. What kind of help did you actually receive?Check all that apply (choice=2. Development of the idea)	14. What kind of help did you actually receive?Check all that apply (choice=3. Gathering background research information, or finding a research site or participants)	14. What kind of help did you actually receive?Check all that apply (choice=4. Performing the experiments)	14. What kind of help did you actually receive?Check all that apply (choice=5. Writing the report)	14. What kind of help did you actually receive?Check all that apply (choice=6. Fine tuning the report after it is written)	14. What kind of help did you actually receive?Check all that apply (choice=7. Designing the poster board and presentation)	14. What kind of help did you actually receive?Check all that apply (choice=8. Producing charts or grap4 - HS)	14. What kind of help did you actually receive?Check all that apply (choice=9. Coaching for the interview with judges)
		Female	Male	Yes	No			Individual	Team	Yes	No	Proj Req
1 - MED	MD St	0	1	0	1								1	1	1	1	1	1	0	1	1	0	0	0	0	0	0	0	0	0	1	0	0	1	0	1	1	0	1	0	0	0	0	0	0	0	0	0	0
1 - MED	MD St	1	0	0	1								1	1	1	1	1	1	1	1	1	0	0	0	0	0	0	0	0	0	1	1	0	0	0	0	0	0	1	0	0	0	0	0	0	0	0	0	0
1 - MED	MD St	1	0	0	1								1	1	1	1	1	1	0	1	1	0	0	0	0	0	0	0	0	0	0	0	0	0	0	1	0	0	1	0	0	0	0	0	0	0	0	0	0
1 - MED	MD St	0	1	0	1								1	0	1	1	1	1	1	1	1	0	0	0	0	0	0	0	0	0	1	1	0	0	0	1	1	1	1	0	0	0	0	0	0	0	0	0	0
1 - MED	MD St	0	1	0	1								1	0	0	1	1	1	0	1	1	0	0	0	0	0	0	0	0	0	0	1	1	0	0	1	0	1	1	0	0	0	0	0	0	0	0	0	0
1 - MED	MD St	1	0	1	0	11th	No	1	0	0	0	1	1	0	0	1	1	0	0	1	1	1	0	0	1	1	0	0	1	0	0	1	1	0	0	0	0	0	1	0	0	1	1	0	0	0	0	0	0
1 - MED	MD St	1	0	0	1								0	0	0	0	0	0	0	1	1	0	0	0	0	0	0	0	0	0	0	1	0	0	0	1	0	0	1	0	0	0	0	0	0	0	0	0	0
1 - MED	MD St	0	1	0	1								1	1	1	1	1	1	1	1	1	0	0	0	0	0	0	0	0	0	0	1	1	1	0	1	1	1	1	0	0	0	0	0	0	0	0	0	0
1 - MED	MD St	0	1	0	1								1	1	1	1	1	1	1	1	1	0	0	0	0	0	0	0	0	0	0	1	0	0	1	1	1	1	0	0	0	0	0	0	0	0	0	0	0
1 - MED	MD St	0	1	0	1								1	1	1	1	1	1	1	1	1	0	0	0	0	0	0	0	0	0	0	1	1	1	0	1	1	1	1	0	0	0	0	0	0	0	0	0	0
1 - MED	MD St	0	1	0	1								1	1	1	1	1	0	0	1	1	0	0	0	0	0	0	0	0	0	0	1	1	1	0	1	1	1	1	0	0	0	0	0	0	0	0	0	0
1 - MED	MD St	1	0	0	1								1	1	1	1	1	1	0	1	1	0	0	0	0	0	0	0	0	0	1	1	1	1	0	1	1	0	1	0	0	0	0	0	0	0	0	0	0
1 - MED	MD St	0	1	0	1								1	1	1	1	0	1	0	1	1	0	0	0	0	0	0	0	0	0	0	1	0	0	0	1	1	0	1	0	0	0	0	0	0	0	0	0	0
1 - MED	MD St	0	1	0	1								0	0	0	1	1	1	0	1	1	0	0	0	0	0	0	0	0	0	0	1	1	1	1	1	1	1	1	1	0	0	0	0	0	0	0	0	0
1 - MED	MD St	1	0	0	1								1	1	1	1	1	1	0	1	1	0	0	0	0	0	0	0	0	0	1	1	1	0	0	1	0	0	1	0	0	0	0	0	0	0	0	0	0
1 - MED	MD St	0	1	0	1								1	1	1	1	1	1	1	1	1	0	0	0	0	0	0	0	0	0	0	1	0	1	0	1	0	0	1	0	0	0	0	0	0	0	0	0	0
1 - MED	MD St	0	1	0	1								1	1	1	1	1	1	1	1	1	0	0	0	0	0	0	0	0	0	1	1	1	1	1	1	1	1	1	1	0	0	0	0	0	0	0	0	0
1 - MED	MD St	1	0	0	1								1	1	1	1	1	0	0	1	1	0	0	0	0	0	0	0	0	0	0	1	1	0	0	1	0	0	1	0	0	0	0	0	0	0	0	0	0
1 - MED	MD St			1	0	10th	No	1	0	1	0	0	1	0	0	1	1	0	0	1	1	1	0	0	1	0	0	0	1	1	0	1	0	0	0	1	0	1	0	0	0	1	0	0	0	1	0	0	0
1 - MED	MD St	1	0	0	1								1	1	1	1	1	1	0	1	1	0	0	0	0	0	0	0	0	0	0	1	1	1	1	1	1	1	1	0	0	0	0	0	0	0	0	0	0
1 - MED	MD St	1	0	0	1								1	1	1	1	1	1	1	1	1	0	0	0	0	0	0	0	0	0	1	1	1	1	1	1	1	1	1	0	0	0	0	0	0	0	0	0	0
1 - MED	MD St	0	1	1	0	9th	Yes	1	0	1	0	0	1	1	0	1	0	0	1	1	1	1	0	0	0	0	0	0	0	1	0	1	0	1	0	0	1	1	1	0	0	1	0	1	0	1	0	0	1
1 - MED	MD St	0	1	0	1								1	1	1	1	1	1	0	1	1	0	0	0	0	0	0	0	0	0	0	1	1	0	0	1	1	1	0	0	0	0	0	0	0	0	0	0	0
1 - MED	MD St	0	1	0	1								1	0	0	1	1	0	0	1	1	0	0	0	0	0	0	0	0	0	0	1	1	1	0	0	0	0	0	0	0	0	0	0	0	0	0	0	0
1 - MED	MD St	0	1	0	1								1	1	1	1	1	1	0	1	1	0	0	0	0	0	0	0	0	0	1	1	1	1	0	1	1	1	1	0	0	0	0	0	0	0	0	0	0
1 - MED	MD St	0	1	1	0	12th	Yes	1	0	1	0	0	1	1	1	1	1	1	0	1	1	1	0	0	0	0	0	0	1	1	0	1	1	1	0	1	1	0	1	0	0	1	1	1	0	1	1	1	0
1 - MED	MD St	0	1	0	1								0	0	0	1	0	1	0	1	0	0	0	0	0	0	0	0	0	0	0	0	1	1	0	1	1	0	1	0	0	0	0	0	0	0	0	0	0
1 - MED	MD St	0	1	1	0	12th	Yes	1	0	1	0	0	1	1	0	1	0	1	0	1	1	1	0	0	0	0	0	0	1	1	0	1	0	1	0	1	1	1	0	0	0	0	0	0	0	0	1	1	0
1 - MED	MD St	1	0	0	1								1	1	1	1	1	0	0	0	0	0	0	0	0	0	0	0	0	0	1	1	1	0	0	1	0	0	1	0	0	0	0	0	0	0	0	0	0
1 - MED	MD St	0	1	0	1								1	1	1	1	1	1	1	1	1	0	0	0	0	0	0	0	0	0	0	1	1	1	1	1	1	1	1	1	0	0	0	0	0	0	0	0	0
1 - MED	MD St	1	0	0	1								1	1	1	0	0	0	0	1	1	0	0	0	0	0	0	0	0	0	1	1	0	0	0	1	0	0	0	0	0	0	0	0	0	0	0	0	0
1 - MED	MD St	1	0	0	1								0	0	0	1	1	0	0	1	0	0	0	0	0	0	0	0	0	0	0	0	0	0	0	0	0	0	0	0	0	0	0	0	0	0	0	0	0
1 - MED	MD St	1	0	0	1								0	0	0	1	0	1	0	1	1	0	0	0	0	0	0	0	0	0	0	1	0	0	0	1	0	0	1	0	0	0	0	0	0	0	0	0	0
1 - MED	MD St	0	1	1	0	11th	Yes	1	0	0	1	0	1	0	0	1	0	0	0	1	1	0	0	0	0	0	0	0	1	1	0	0	1	0	0	0	0	0	0	0	0	1	0	0	0	0	0	0	0
1 - MED	MD St	1	0	1	0	12th	Yes	1	0	0	1	0	0	0	0	1	0	1	0	1	1	0	0	0	0	0	1	0	1	1	0	1	0	0	0	1	0	1	0	0	0	1	0	0	0	1	0	1	0
1 - MED	MD St	1	0	0	1								1	1	1	0	0	0	0	1	1	0	0	0	0	0	0	0	0	0	0	0	1	0	0	1	0	1	1	0	0	0	0	0	0	0	0	0	0
1 - MED	MD St	0	1	0	1								0	0	0	1	1	0	0	1	1	0	0	0	0	0	0	0	0	0	1	1	1	0	0	0	0	0	1	0	0	0	0	0	0	0	0	0	0
1 - MED	MD St	0	1	0	1								1	1	1	1	1	0	0	1	1	0	0	0	0	0	0	0	0	0	1	1	0	0	0	1	1	0	1	0	0	0	0	0	0	0	0	0	0
1 - MED	MD St	1	0	0	1								1	1	0	1	1	1	0	1	0	0	0	0	0	0	0	0	0	0	0	1	0	0	0	0	0	1	1	0	0	0	0	0	0	0	0	0	0
1 - MED	MD St	1	0	0	1								0	0	0	0	1	0	0	1	1	0	0	0	0	0	0	0	0	0	1	1	1	1	0	1	0	0	1	0	0	0	0	0	0	0	0	0	0
1 - MED	MD St	1	0	1	Yes	10th	Yes	1	0	1	0	0	1	1	1	1	1	1	1	1	1	1	0	0	0	0	1	0	1	1	1	1	0	0	0	1	1	1	1	0	0	0	0	1	0	1	1	1	0
1 - MED	MD St	1	0	0	1								0	0	0	0	1	0	0	1	1	0	0	0	0	0	0	0	0	0	0	1	0	0	0	1	1	1	1	0	0	0	0	0	0	0	0	0	0
1 - MED	MD St	1	0	0	1								0	0	0	1	1	0	0	1	1	0	0	0	0	0	0	0	0	0	1	0	1	1	1	0	1	1	0	0	0	0	0	0	0	0	0	0	0
1 - MED	MD St	1	0	0	1								0	0	0	1	1	1	1	1	1	0	0	0	0	0	0	0	0	0	0	0	0	0	0	0	0	0	1	0	0	0	0	0	0	0	0	0	0
1 - MED	MD St	0	1	1	Yes	9th	No	1	0	0	0	1	1	1	1	1	1	1	0	1	1	1	0	0	0	0	0	0	0	0	1	1	1	1	1	1	1	1	1	1	1	1	1	1	1	0	0	1	0
1 - MED	MD St	0	1	0	1								1	1	1	1	1	1	1	1	1	0	0	0	0	0	0	0	0	0	0	1	0	1	0	0	1	1	1	0	0	0	0	0	0	0	0	0	0
1 - MED	MD St	1	0	1	Yes	12th	No	1	0	0	1	0	1	1	1	1	1	1	1	1	1	1	0	0	1	1	1	0	1	0	1	1	1	1	1	1	1	1	1	0	1	1	1	1	1	1	1	1	0
1 - MED	MD St	1	0	0	1								1	1	0	1	1	0	0	1	0	0	0	0	0	0	0	0	0	0	0	1	1	0	0	0	1	1	0	0	0	0	0	0	0	0	0	0	0
1 - MED	MD St	0	1	0	1								1	0	1	1	1	1	0	1	1	0	0	0	0	0	0	0	0	0	1	1	1	1	1	1	1	1	1	0	0	0	0	0	0	0	0	0	0
1 - MED	MD St	0	1	0	1								1	1	1	1	1	1	0	1	1	0	0	0	0	0	0	0	0	0	1	1	0	0	0	0	0	0	0	0	0	0	0	0	0	0	0	0	0
1 - MED	MD St	0	1	1	Yes	12th	Yes	1	0	1	0	0	1	1	1	1	0	0	0	1	1	1	1	0	0	0	0	0	1	1	1	1	0	0	0	1	1	0	1	0	0	1	0	0	0	1	1	0	0
1 - MED	MD St	1	0	0	1								1	1	1	1	1	1	0	1	1	0	0	0	0	0	0	0	0	0	1	1	1	0	0	1	1	1	1	0	0	0	0	0	0	0	0	0	0
1 - MED	MD St	0	1	0	1								1	1	1	1	1	1	1	1	1	0	0	0	0	0	0	0	0	0	0	1	1	1	1	1	1	1	1	0	0	0	0	0	0	0	0	0	0
1 - MED	MD St	0	1	0	1								1	1	1	1	0	0	0	1	1	0	0	0	0	0	0	0	0	0	1	1	0	0	0	0	1	0	1	0	0	0	0	0	0	0	0	0	0
1 - MED	MD St	0	1	0	1								1	1	0	0	1	0	0	1	1	0	0	0	0	0	0	0	0	0	0	1	1	0	0	1	0	0	1	0	0	0	0	0	0	0	0	0	0
1 - MED	MD St	0	1	0	1								0	0	0	0	0	1	0	1	1	0	0	0	0	0	0	0	0	0	1	1	0	1	0	0	0	0	0	0	0	0	0	0	0	0	0	0	0
1 - MED	MD St	0	1	0	1								0	0	0	1	1	0	0	1	1	0	0	0	0	0	0	0	0	0	0	0	0	0	0	0	1	0	1	0	0	0	0	0	0	0	0	0	0
1 - MED	MD St	1	0	0	1								1	0	0	1	1	1	0	1	1	0	0	0	0	0	0	0	0	0	0	1	0	0	0	1	0	0	1	0	0	0	0	0	0	0	0	0	0
1 - MED	MD St	1	0	0	1								0	0	0	1	1	1	0	1	1	0	0	0	0	0	0	0	0	0	0	1	1	0	0	1	0	0	1	0	0	0	0	0	0	0	0	0	0
1 - MED	MD St	0	1	1	Yes	10th	Yes	1	0	1	0	0	0	0	0	0	0	0	0	0	0	0	0	0	0	0	0	0	0	0	0	0	0	0	0	0	0	0	0	0	0	0	0	0	0	0	0	0	0
1 - MED	MD St	1	0	1	Yes	9th	No	1	0	1	0	0	1	1	1	1	1	0	0	1	1	1	0	0	0	0	0	0	1	0	0	1	1	1	1	1	1	1	1	0	0	1	1	1	1	1	1	1	1
1 - MED	MD St	1	0	0	1								1	1	1	1	0	0	0	1	1	0	0	0	0	0	0	0	0	0	0	0	0	1	0	1	0	0	1	0	0	0	0	0	0	0	0	0	0
2 - GRAD	PhD Stu	n.ask	n.ask	0	1		n.ask			0	1	0	1	1	1	1	1	1	0	1	1	0	0	0	0	0	0	0	0	0	0	1	1	1	1	1	1	1	1	0	0	0	0	0	0	0	0	0	0
2 - GRAD	PhD Stu	n.ask	n.ask	1	0		n.ask	1	0	0	1	0	1	1	1	1	1	1	0	0	0	1	0	0	0	0	1	0	0	1	0	0	0	1	0	0	0	0	1	0	0	0	0	1	0	0	0	1	0
2 - GRAD	PhD Stu	n.ask	n.ask	0	1		n.ask						1	1	1	1	1	1	0	1	1	0	0	0	0	0	0	0	0	0	0	1	0	0	0	1	0	0	1	0	0	0	0	0	0	0	0	0	0
2 - GRAD	PhD Stu	n.ask	n.ask	0	1		n.ask			0	1	0	1	0	0	1	1	1	0	0	0	0	0	0	0	0	0	0	0	0	0	1	0	1	0	1	0	1	1	0	0	0	0	0	0	0	0	0	0
2 - GRAD	PhD Stu	n.ask	n.ask	0	1		n.ask			0	1	0	1	1	1	1	1	1	1	1	1	0	0	0	0	0	0	0	0	0	0	1	1	1	0	1	1	0	1	0	0	0	0	0	0	0	0	0	0
2 - GRAD	PhD Stu	n.ask	n.ask	0	1		n.ask			0	1	0	0	0	0	1	0	1	0	1	1	0	0	0	0	0	0	0	0	0	0	0	1	0	0	1	0	0	1	0	0	0	0	0	0	0	0	0	0
2 - GRAD	PhD Stu	n.ask	n.ask	1	0	12th	n.ask	1	0	0	1	0	1	1	1	1	1	1	0	1	1	1	0	0	1	0	1	0	1	1	1	1	1	1	0	1	0	0	0	0	1	1	0	1	1	0	0	0	0
2 - GRAD	PhD Stu	n.ask	n.ask	1	0	11th	n.ask	0	1	0	1	0	0	0	0	1	0	1	0	1	1	0	0	0	1	1	0	0	1	0	0	0	1	1	0	0	1	0	0	0	0	0	1	1	1	0	0	0	0
2 - GRAD	PhD Stu	n.ask	n.ask	0	1		n.ask			0	1	0	1	1	1	1	0	1	0	1	1	0	0	0	0	0	0	0	0	0	0	1	1	0	0	0	0	0	0	0	0	0	0	0	0	0	0	0	0
2 - GRAD	PhD Stu	n.ask	n.ask	1	0	12th	n.ask	1	0	1	0	0	1	1	1	1	1	1	1	1	1	0	0	0	1	0	0	0	1	1	1	1	0	0	0	1	0	0	0	0	1	0	0	0	0	0	0	0	0
2 - GRAD	PhD Stu	n.ask	n.ask	0	1		n.ask			0	1	0	1	1	0	1	1	1	0	1	0	0	0	0	0	0	0	0	0	0	0	1	0	0	0	1	1	1	0	0	0	0	0	0	0	0	0	0	0
2 - GRAD	PhD Stu	n.ask	n.ask	0	1		n.ask			0	1	0	1	1	1	1	1	0	0	1	0	0	0	0	0	0	0	0	0	0	0	1	0	0	0	1	1	0	1	0	0	0	0	0	0	0	0	0	0
2 - GRAD	PhD Stu	n.ask	n.ask	0	1		n.ask			0	1	0	1	1	1	1	1	0	0	1	0	0	0	0	0	0	0	0	0	0	0	1	1	0	0	1	0	1	1	0	0	0	0	0	0	0	0	0	0
2 - GRAD	PhD Stu	n.ask	n.ask	0	1		n.ask			0	1	0	1	1	1	1	1	1	0	1	1	0	0	0	0	0	0	0	0	0	0	1	1	1	0	1	0	1	1	0	0	0	0	0	0	0	0	0	0
2 - GRAD	PhD Stu	n.ask	n.ask	1	0	10th	n.ask	0	1	1	0	0	1	1	0	1	0	1	0	1	1	1	0	0	1	0	0	0	1	1	0	0	0	1	0	1	0	0	0	0	0	0	0	0	1	0	1	1	0
2 - GRAD	PhD St	0	1	0	1								1	1	1	1	1	1	0	1	1	0	0	0	0	0	0	0	0	0	0	1	1	0	0	1	1	0	1	0	0	0	0	0	0	0	0	0	0
2 - GRAD	PhD St	0	1	0	1								0	0	0	1	0	1	0	1	0	0	0	0	0	0	0	0	0	0	0	0	0	1	1	1	1	0	0	0	0	0	0	0	0	0	0	0	0
2 - GRAD	PhD St	0	1	1	0	12th	No	0	1	0	1	0	0	0	0	1	1	1	0	1	1	0	0	0	0	1	0	0	0	0	0	1	0	1	0	1	0	0	1	0	0	0	0	0	0	0	0	0	0
2 - GRAD	PhD St	1	0	0	1								0	0	0	1	0	1	0	1	1	0	0	0	0	0	0	0	0	0	0	1	1	1	0	1	1	0	0	0	0	0	0	0	0	0	0	0	0
2 - GRAD	PhD St	1	0	0	1								1	1	1	1	1	1	0	1	1	0	0	0	0	0	0	0	0	0	0	1	1	0	0	1	0	1	1	0	0	0	0	0	0	0	0	0	0
2 - GRAD	PhD St	0	1	0	1								1	1	1	1	1	1	1	1	1	0	0	0	0	0	0	0	0	0	1	0	1	0	0	1	0	0	1	0	0	0	0	0	0	0	0	0	0
2 - GRAD	PhD St	0	1	0	1								1	1	1	1	1	1	1	1	1	0	0	0	0	0	0	0	0	0	1	1	0	0	0	1	1	0	1	0	0	0	0	0	0	0	0	0	0
2 - GRAD	PhD St	0	1	0	1								1	1	1	1	1	1	0	1	1	0	0	0	0	0	0	0	0	0	1	0	0	0	0	0	0	0	0	0	0	0	0	0	0	0	0	0	0
2 - GRAD	PhD St	1	0	0	1								1	1	1	1	1	1	0	1	1	0	0	0	0	0	0	0	0	0	1	1	1	1	1	1	1	1	0	0	0	0	0	0	0	0	0	0	0
2 - GRAD	MD-PhD St	0	1	0	1								1	1	1	1	1	1	0	1	1	0	0	0	0	0	0	0	0	0	0	1	0	0	0	1	0	0	1	0	0	0	0	0	0	0	0	0	0
2 - GRAD	PhD St	1	0	0	1								0	0	0	1	0	1	0	1	1	0	0	0	0	0	0	0	0	0	0	1	0	0	0	1	1	0	1	0	0	0	0	0	0	0	0	0	0
2 - GRAD	PhD St	1	0	0	1								1	1	1	1	1	1	0	1	1	0	0	0	0	0	0	0	0	0	0	1	0	0	0	1	0	0	1	0	0	0	0	0	0	0	0	0	0
3 - SURF	Soph	0	1	1	0	9th	No	1	0	1	0	0	1	0	0	1	0	0	0	0	0	1	0	0	1	0	0	0	0	0	0	0	0	1	0	1	0	0	1	0	0	0	0	1	0	1	0	0	0
3 - SURF	Junior	0	1	0	1								1	1	1	1	1	1	0	1	1	0	0	0	0	0	0	0	0	0	1	1	1	0	0	1	0	0	0	0	0	0	0	0	0	0	0	0	0
3 - SURF	Soph	1	0	0	1								0	0	0	1	1	1	1	1	1	0	0	0	0	0	0	0	0	0	0	0	1	1	0	1	1	0	0	0	0	0	0	0	0	0	0	0	0
3 - SURF	Soph	0	1	0	1								0	0	0	1	0	1	0	1	1	0	0	0	0	0	0	0	0	0	0	1	1	1	0	0	0	1	1	0	0	0	0	0	0	0	0	0	0
3 - SURF	Soph	1	0	0	1								0	0	0	1	0	1	1	1	0	0	0	0	0	0	0	0	0	0	0	1	0	0	0	1	0	1	0	0	0	0	0	0	0	0	0	0	0
3 - SURF	Junior	1	0	1	0		Yes	1	0	1	0	0	0	0	0	1	1	1	0	1	1	0	0	0	1	0	0	0	0	0	0	1	1	1	1	1	1	1	0	0	0	1	0	0	0	0	0	0	0
3 - SURF	Soph	0	1	0	1								1	1	1	1	1	1	0	1	1	0	0	0	0	0	0	0	0	0	1	1	1	0	0	1	0	0	1	0	0	0	0	0	0	0	0	0	0
3 - SURF	Junior	1	0	1	0	11th	Yes	1	0	0	0	1	1	1	0	1	1	1	0	1	1	1	0	0	1	0	1	0	1	1	0	1	0	0	0	0	0	0	1	0	0	0	0	0	0	0	0	0	1
3 - SURF	Soph	0	1	0	1								0	0	0	0	0	1	0	1	1	0	0	0	0	0	0	0	0	0	0	1	1	1	0	0	0	0	0	0	0	0	0	0	0	0	0	0	0
3 - SURF	Junior	0	1	0	1								0	0	0	1	1	0	0	0	0	0	0	0	0	0	0	0	0	0	1	1	1	0	0	0	0	0	0	0	0	0	0	0	0	0	0	0	0
3 - SURF	Senior	0	1	1	0	12th	No	1	0	0	1	0	1	1	1	1	1	1	0	1	1	0	0	0	0	1	1	0	0	0	1	0	1	0	0	1	0	0	1	0	1	0	0	0	0	1	0	0	0
3 - SURF	Senior	0	1	1	0	9th	No	1	0	1	0	0	1	1	1	1	1	1	0	1	1	0	0	0	1	0	0	0	0	0	1	0	1	0	0	1	0	0	0	0	0	0	0	0	0	1	0	0	0
3 - SURF	Junior	0	1	1	0	12th	Yes	0	1	0	1	0	1	0	1	1	1	1	0	0	0	0	0	0	1	1	0	0	0	0	0	1	1	0	0	1	1	0	1	0	0	0	1	0	0	1	0	0	1
3 - SURF	Junior	1	0	0	1								1	1	0	1	0	1	0	1	1	0	0	0	0	0	0	0	0	0	0	1	1	0	0	1	0	0	1	0	0	0	0	0	0	0	0	0	0
3 - SURF	Soph	1	0	0	1								1	0	0	1	1	1	0	0	0	0	0	0	0	0	0	0	0	0	0	1	1	0	0	1	1	0	1	0	0	0	0	0	0	0	0	0	0
3 - SURF	Junior	1	0	0	1								1	0	0	1	0	1	0	1	1	0	0	0	0	0	0	0	0	0	0	1	0	1	1	1	1	1	0	0	0	0	0	0	0	0	0	0	0
3 - SURF	Soph	0	1	0	1								1	1	1	0	0	1	0	1	1	0	0	0	0	0	0	0	0	0	0	0	0	0	0	1	0	0	1	0	0	0	0	0	0	0	0	0	0
3 - SURF	Soph	1	0	0	1								1	1	1	1	0	0	0	1	1	0	0	0	0	0	0	0	0	0	0	1	1	0	0	1	0	0	1	0	0	0	0	0	0	0	0	0	0
3 - SURF	Junior	0	1	1	0	12th	No	1	0	0	0	1	1	1	1	1	1	1	0	1	1	0	0	0	1	0	0	0	0	0	0	1	1	0	0	1	0	0	1	0	0	1	0	0	0	0	0	0	0
3 - SURF	Soph	1	0	0	1								0	0	0	1	1	1	0	1	1	0	0	0	0	0	0	0	0	0	0	1	0	0	0	1	0	0	0	0	0	0	0	0	0	0	0	0	0
3 - SURF	Fresj	0	1	1	0	11th	Yes	1	0	0	1	0	1	1	1	1	1	1	0	1	1	1	0	0	1	0	0	0	1	1	0	1	0	0	0	1	1	1	1	0	0	1	0	0	0	1	0	0	1
3 - SURF	Senior	0	1	0	1								0	0	0	1	0	1	0	1	1	0	0	0	0	0	0	0	0	0	0	1	1	1	1	1	1	0	0	0	0	0	0	0	0	0	0	0	0
3 - SURF	Soph	0	1	1	0	10th	Yes	1	0	1	0	0	1	0	0	1	1	0	0	1	1	1	0	0	0	0	0	0	1	1	0	1	1	0	0	0	0	0	1	0	0	1	0	1	0	0	0	0	0
3 - SURF	Junior	0	1	0	1								0	0	0	1	1	1	0	0	0	0	0	0	0	0	0	0	0	0	1	1	1	0	0	0	0	0	0	0	0	0	0	0	0	0	0	0	0
3 - SURF	Junior	1	0	0	1								1	1	1	1	1	1	0	1	1	0	0	0	0	0	0	0	0	0	0	1	0	1	0	1	0	0	1	0	0	0	0	0	0	0	0	0	0
3 - SURF	Soph	0	1	0	1								0	0	0	1	0	1	0	1	1	0	0	0	0	0	0	0	0	0	0	1	1	1	1	0	1	0	1	0	0	0	0	0	0	0	0	0	0
3 - SURF	Junior	0	1	0	1								1	1	1	1	1	0	1	1	1	0	0	0	0	0	0	0	0	0	0	0	1	1	0	1	1	1	0	0	0	0	0	0	0	0	0	0	0
3 - SURF	Junior	1	0	0	1								1	1	1	1	1	1	1	1	1	0	0	0	0	0	0	0	0	0	0	1	1	1	0	1	0	0	0	0	0	0	0	0	0	0	0	0	0
3 - SURF	Junior	0	1	0	1								1	1	1	1	1	1	1	1	1	0	0	0	0	0	0	0	0	0	0	1	1	1	0	1	0	0	1	0	0	0	0	0	0	0	0	0	0
3 - SURF	Junior	1	0	1	0	10th	Yes	1	0	0	0	1	1	1	1	1	1	1	0	1	1	0	0	0	1	1	0	0	0	0	0	0	1	1	0	1	0	0	1	0	0	0	1	1	0	1	0	0	0
3 - SURF	Senior	0	1	1	0	12th	Yes	0	1	1	0	0	1	1	1	1	1	1	1	1	1	1	0	0	1	1	0	0	1	1	0	1	1	0	0	0	0	0	0	0	0	1	1	1	0	0	0	0	0
3 - SURF	Junior	1	0	0	1								0	0	0	1	0	1	1	1	1	0	0	0	0	0	0	0	0	0	0	1	0	1	0	1	1	0	0	0	0	0	0	0	0	0	0	0	0
3 - SURF	Soph	0	1	0	1								1	0	0	0	1	1	0	1	0	0	0	0	0	0	0	0	0	0	1	1	0	0	0	0	0	0	0	0	0	0	0	0	0	0	0	0	0
3 - SURF	Junior	1	0	0	1								0	0	0	1	1	0	0	1	1	0	0	0	0	0	0	0	0	0	0	0	0	0	0	1	1	0	1	0	0	0	0	0	0	0	0	0	0
3 - SURF	Junior	1	0	1	0	10th	Yes	1	0	0	0	1	1	1	1	1	0	1	0	1	1	0	0	0	0	1	0	0	0	0	0	0	0	0	0	1	0	0	1	0	0	0	0	0	0	0	1	0	0
3 - SURF	Soph	1	0	0	1								0	0	0	1	0	0	0	1	1	0	0	0	0	0	0	0	0	0	0	1	1	0	0	0	0	0	0	0	0	0	0	0	0	0	0	0	0
3 - SURF	Junior	1	0	0	1								1	1	1	1	0	1	0	1	1	0	0	0	0	0	0	0	0	0	0	0	1	0	0	1	0	0	0	0	0	0	0	0	0	0	0	0	0
3 - SURF	Junior	0	1	1	0	12th	No	1	0	0	1	0	1	0	0	1	0	1	1	1	1	1	0	0	1	0	1	1	0	0	0	1	0	1	0	1	1	0	1	0	0	1	0	1	0	1	1	0	1
3 - SURF	Senior	0	1	0	1								1	1	1	1	1	1	0	1	1	0	0	0	0	0	0	0	0	0	0	0	0	0	0	1	0	0	1	0	0	0	0	0	0	0	0	0	0
3 - SURF	Senior	0	1	0	1								1	1	1	0	1	0	0	1	1	0	0	0	0	0	0	0	0	0	0	1	1	1	0	0	0	0	0	0	0	0	0	0	0	0	0	0	0
3 - SURF	Junior	1	0	0	1								0	0	0	1	1	1	0	0	0	0	0	0	0	0	0	0	0	0	1	1	0	0	0	0	0	0	0	0	0	0	0	0	0	0	0	0	0
3 - SURF	Junior	1	0	0	1								1	1	1	1	1	0	0	1	1	0	0	0	0	0	0	0	0	0	0	1	1	0	0	1	1	1	0	0	0	0	0	0	0	0	0	0	0
3 - SURF	Junior	1	0	0	1								0	0	0	0	1	0	0	1	1	0	0	0	0	0	0	0	0	0	0	1	1	0	0	1	1	0	1	0	0	0	0	0	0	0	0	0	0
3 - SURF	Soph	0	1	0	1								1	1	1	1	1	1	0	1	1	0	0	0	0	0	0	0	0	0	0	1	0	1	0	1	0	1	1	0	0	0	0	0	0	0	0	0	0
3 - SURF	Soph	0	1	1	0	12th	Yes	1	0	0	0	1	1	1	1	1	1	0	0	1	1	1	0	0	1	0	0	0	1	1	0	0	0	0	0	1	1	1	0	0	0	0	0	0	0	1	0	0	0
3 - SURF	Soph	0	1	0	1								1	1	1	1	0	0	0	1	1	0	0	0	0	0	0	0	0	0	0	1	1	0	0	0	1	1	1	0	0	0	0	0	0	0	0	0	0
3 - SURF	Junior	1	0	0	1								0	0	0	1	0	1	0	1	1	0	0	0	0	0	0	0	0	0	0	1	1	0	0	1	0	0	1	0	0	0	0	0	0	0	0	0	0
3 - SURF	Soph	1	0	0	1								1	1	1	1	1	0	0	0	0	0	0	0	0	0	0	0	0	0	0	0	1	0	0	1	1	0	1	0	0	0	0	0	0	0	0	0	0
3 - SURF	Junior	1	0	0	1								1	1	1	1	1	0	0	1	1	0	0	0	0	0	0	0	0	0	0	1	1	0	0	1	0	0	1	0	0	0	0	0	0	0	0	0	0
3 - SURF	Junior	1	0	0	1								0	0	0	1	1	1	0	1	0	0	0	0	0	0	0	0	0	0	0	0	0	1	1	0	1	0	0	0	0	0	0	0	0	0	0	0	0
3 - SURF	Junior	1	0	0	1								1	0	0	1	0	0	0	1	1	0	0	0	0	0	0	0	0	0	0	1	0	0	0	1	0	1	0	0	0	0	0	0	0	0	0	0	0
3 - SURF	Junior	0	1	0	1								1	1	1	0	0	0	0	1	1	0	0	0	0	0	0	0	0	0	1	1	0	0	0	1	1	0	1	0	0	0	0	0	0	0	0	0	0
3 - SURF	Senior	1	0	0	1								1	1	1	1	0	1	1	1	0	0	0	0	0	0	0	0	0	0	0	1	1	0	0	1	0	0	0	0	0	0	0	0	0	0	0	0	0
3 - SURF	Soph	1	0	0	1								1	1	1	1	1	1	1	1	1	0	0	0	0	0	0	0	0	0	0	0	1	1	1	1	1	1	1	0	0	0	0	0	0	0	0	0	0
3 - SURF	Soph	1	0	0	1								0	0	0	1	0	1	0	1	0	0	0	0	0	0	0	0	0	0	0	0	1	0	0	0	0	0	0	0	0	0	0	0	0	0	0	0	0
3 - SURF	Junior	1	0	0	1								1	0	0	1	1	1	0	1	1	0	0	0	0	0	0	0	0	0	0	1	0	1	0	1	0	1	1	0	0	0	0	0	0	0	0	0	0
3 - SURF	Junior	1	0	0	1								1	1	0	1	1	0	0	1	1	0	0	0	0	0	0	0	0	0	0	1	1	0	0	1	0	0	1	0	0	0	0	0	0	0	0	0	0
3 - SURF	Junior	1	0	1	0	12th	Yes	0	1	1	0	0	1	1	1	1	1	1	0	1	1	0	0	0	1	0	1	0	1	1	1	1	1	1	0	1	1	1	0	0	1	1	1	1	0	0	1	1	0
3 - SURF	Soph	1	0	0	1								1	1	1	1	1	1	0	1	1	0	0	0	0	0	0	0	0	0	0	0	1	1	0	0	0	0	1	0	0	0	0	0	0	0	0	0	0
3 - SURF	Soph	1	0	1	0	9th	Yes	1	0	0	1	0	1	1	1	1	0	1	0	1	1	1	0	0	1	0	0	0	1	1	0	0	0	1	0	1	0	0	1	0	0	0	0	1	0	1	0	0	0
3 - SURF	Fresj	0	1	1	0	11th	No	0	1	0	1	0	1	1	1	1	1	1	0	1	1	0	1	0	0	0	1	0	0	0	0	1	0	0	0	0	0	0	1	0	0	1	0	0	0	0	0	0	0
3 - SURF	Fresj	0	1	1	0	9th	No	1	0	0	1	0	1	1	1	1	1	1	0	1	1	0	0	0	1	0	0	0	0	0	0	0	0	1	0	1	0	0	1	0	0	1	0	1	0	1	0	0	0
3 - SURF	Junior	1	0	1	0	9th	No	1	0	1	0	0	0	0	0	1	0	1	0	1	1	1	0	0	1	0	0	0	1	0	0	1	0	0	0	1	1	0	1	0	0	1	0	0	0	1	0	0	0
3 - SURF	Junior	1	0	1	0	11th	Yes	0	1	1	0	0	1	1	0	1	1	1	0	0	0	0	0	0	1	1	0	0	0	0	0	1	0	0	0	1	0	0	1	0	0	1	0	0	0	1	0	0	1
3 - SURF	Junior	1	0	0	1								1	1	1	1	1	1	0	1	1	0	0	0	0	0	0	0	0	0	0	0	0	0	0	1	0	0	1	0	0	0	0	0	0	0	0	0	0
3 - SURF	Soph	1	0	1	0	12th	Yes	1	0	0	1	0	1	0	0	1	0	1	0	1	1	1	0	0	1	0	0	0	1	0	0	1	0	1	0	1	0	0	1	0	0	1	0	1	0	1	0	0	0
3 - SURF	Junior	0	1	0	1								0	0	0	1	1	1	0	1	0	0	0	0	0	0	0	0	0	0	0	1	0	0	0	1	0	0	0	0	0	0	0	0	0	0	0	0	0
3 - SURF	Junior	0	1	0	1								1	1	1	1	1	1	0	1	1	0	0	0	0	0	0	0	0	0	0	1	1	1	0	1	1	0	1	0	0	0	0	0	0	0	0	0	0
3 - SURF	Soph	1	0	0	1								1	1	1	1	1	1	0	1	1	0	0	0	0	0	0	0	0	0	0	0	0	0	0	1	0	0	1	0	0	0	0	0	0	0	0	0	0
3 - SURF	Soph	1	0	0	1								1	1	1	1	1	0	0	0	1	0	0	0	0	0	0	0	0	0	0	1	0	1	0	1	1	0	1	0	0	0	0	0	0	0	0	0	0
3 - SURF	Junior	0	1	0	1								1	1	1	0	1	1	0	1	1	0	0	0	0	0	0	0	0	0	0	1	1	1	1	1	1	1	0	0	0	0	0	0	0	0	0	0	0
3 - SURF	Junior	1	0	0	1								0	1	0	0	1	0	0	1	1	0	0	0	0	0	0	0	0	0	0	0	1	1	0	1	0	1	1	0	0	0	0	0	0	0	0	0	0
3 - SURF	Fresj	1	0	1	0	12th	Yes	0	1	0	1	0	0	0	0	1	1	1	0	1	1	1	0	0	1	1	1	0	1	1	1	0	0	0	0	1	0	0	1	0	0	1	0	1	0	1	0	0	1
3 - SURF	Soph	0	1	0	1								1	1	1	1	1	1	1	1	1	0	0	0	0	0	0	0	0	0	0	0	0	0	0	0	1	1	1	0	0	0	0	0	0	0	0	0	0
3 - SURF	Soph	1	0	0	1								0	0	0	1	0	1	0	0	0	0	0	0	0	0	0	0	0	0	0	1	0	0	0	1	0	0	1	0	0	0	0	0	0	0	0	0	0
3 - SURF	Fresj	1	0	0	1								1	1	1	1	1	1	0	1	1	0	0	0	0	0	0	0	0	0	0	1	0	0	0	1	0	0	1	0	0	0	0	0	0	0	0	0	0
3 - SURF	Junior	1	0	0	1								1	1	1	1	1	1	0	1	1	0	0	0	0	0	0	0	0	0	0	1	1	1	0	1	0	0	1	0	0	0	0	0	0	0	0	0	0
3 - SURF	Fresj	0	1	1	0	9th	No	0	1	0	1	0	1	1	1	1	1	1	0	1	1	1	0	0	1	0	0	0	1	1	0	1	0	0	0	1	0	0	1	0	0	1	0	0	0	0	0	0	0
3 - SURF	Fresj	1	0	0	1								1	1	0	1	0	0	0	1	1	0	0	0	0	0	0	0	0	0	0	0	0	1	0	1	1	0	1	0	0	0	0	0	0	0	0	0	0
3 - SURF	Junior	1	0	0	1								1	1	1	1	1	1	0	1	1	0	0	0	0	0	0	0	0	0	0	1	0	0	0	1	0	0	1	0	0	0	0	0	0	0	0	0	0
3 - SURF	Junior	1	0	1	0	10th	Yes	1	0	0	0	1	1	1	1	1	1	1	0	1	1	1	0	0	1	1	0	0	1	1	0	0	1	0	0	1	1	1	1	0	0	0	1	0	0	0	1	1	1
3 - SURF	Junior	1	0	1	0	12th	No	1	0	1	0	0	1	0	0	1	0	1	0	1	1	1	0	0	1	0	0	0	1	1	0	0	1	1	0	1	0	0	1	0	0	0	0	1	0	1	0	1	0
3 - SURF	Soph	1	0	1	0	12th	Yes	0	1	1	0	0	1	1	1	1	1	1	0	1	1	0	0	0	1	1	0	0	0	0	0	1	1	1	1	0	1	1	0	0	0	1	1	1	0	0	0	0	0
3 - SURF	Soph	1	0	0	1								0	0	0	1	1	1	0	1	1	0	0	0	0	0	0	0	0	0	0	0	1	0	0	1	0	0	1	0	0	0	0	0	0	0	0	0	0
3 - SURF	Junior	0	1	0	1								1	1	1	1	0	1	0	0	0	0	0	0	0	0	0	0	0	0	0	1	0	0	0	1	0	0	1	0	0	0	0	0	0	0	0	0	0
3 - SURF	Soph	0	1	0	1								1	1	1	0	1	0	0	1	1	0	0	0	0	0	0	0	0	0	0	0	1	1	0	1	0	0	1	0	0	0	0	0	0	0	0	0	0
3 - SURF	Junior	1	0	0	1								1	1	0	0	0	0	0	0	0	0	0	0	0	0	0	0	0	0	0	1	0	0	0	1	0	0	0	0	0	0	0	0	0	0	0	0	0
3 - SURF	Soph	0	1	0	1								0	0	0	1	0	0	0	1	0	0	0	0	0	0	0	0	0	0	0	1	0	0	0	1	0	0	1	0	0	0	0	0	0	0	0	0	0
3 - SURF	Senior	1	0	0	1								1	1	1	1	1	1	0	1	1	0	0	0	0	0	0	0	0	0	0	0	1	0	0	1	0	0	1	0	0	0	0	0	0	0	0	0	0
3 - SURF	Junior	0	1	1	0	10th	Yes	0	1	0	0	1	1	1	0	1	1	1	0	1	1	1	0	0	1	1	0	0	1	1	1	0	1	1	1	1	1	1	0	0	0	1	1	1	0	1	1	0	0
3 - SURF	Junior	1	0	0	1								1	1	1	1	1	1	0	1	1	0	0	0	0	0	0	0	0	0	0	0	1	1	1	1	1	0	0	0	0	0	0	0	0	0	0	0	0
3 - SURF	Senior	1	0	0	1								1	1	1	1	1	1	0	1	1	0	0	0	0	0	0	0	0	0	0	0	0	0	0	1	1	1	1	0	0	0	0	0	0	0	0	0	0
3 - SURF	Junior	1	0	0	1								1	0	0	1	0	1	1	0	0	0	0	0	0	0	0	0	0	0	0	1	1	1	1	1	1	1	0	0	0	0	0	0	0	0	0	0	0
3 - SURF	Soph	1	0	0	1								0	0	0	1	1	1	0	1	0	0	0	0	0	0	0	0	0	0	0	1	0	1	1	0	1	1	0	0	0	0	0	0	0	0	0	0	0
3 - SURF	Junior	0	1	0	1								1	1	0	1	1	1	0	1	1	0	0	0	0	0	0	0	0	0	0	1	0	1	0	1	0	0	1	0	0	0	0	0	0	0	0	0	0
3 - SURF	Soph	1	0	1	0	12th	Yes	1	0	0	1	0	1	1	1	1	1	1	0	1	1	0	0	0	1	0	1	0	1	1	1	1	0	0	0	1	0	0	1	0	1	1	0	0	0	1	0	0	1
3 - SURF	Fresj	0	1	0	1								1	1	1	1	1	1	1	1	1	0	0	0	0	0	0	0	0	0	0	1	1	0	0	1	1	1	1	0	0	0	0	0	0	0	0	0	0
3 - SURF	Sophomore	1	0	0	1								1	0	0	1	0	0	0	1	1	0	0	0	0	0	0	0	0	0	0	0	1	1	0	1	0	1	0	0	0	0	0	0	0	0	0	0	0
3 - SURF	Junior	1	0	0	1								1	1	1	1	0	1	1	1	1	0	0	0	0	0	0	0	0	0	1	1	1	0	0	1	0	0	1	0	0	0	0	0	0	0	0	0	0
3 - SURF	Sophomore	0	1	1	Yes	9th	No	1	0	1	0	0	1	1	0	1	0	0	0	1	1	1	1	0	0	0	0	0	1	0	0	0	1	1	0	0	0	0	0	0	0	0	1	0	0	0	0	0	0
3 - SURF	Junior	1	0	0	1								1	1	1	1	1	1	1	1	1	0	0	0	0	0	0	0	0	0	1	1	0	0	0	1	1	0	1	0	0	0	0	0	0	0	0	0	0
3 - SURF	Junior	0	1	1	Yes	10th	No	1	0	1	0	0	1	1	1	1	1	1	1	1	1	1	1	0	0	0	0	0	0	0	0	0	0	1	0	1	0	0	1	0	0	0	0	1	0	1	0	0	0
3 - SURF	Junior	1	0	0	1								1	1	0	0	1	0	0	1	1	0	0	0	0	0	0	0	0	0	0	1	1	1	0	1	0	0	1	0	0	0	0	0	0	0	0	0	0
3 - SURF	Junior	1	0	1	Yes	12th	Yes	0	1	0	1	0	0	0	0	1	0	1	0	1	1	0	0	0	1	0	1	0	1	1	0	1	1	0	0	1	0	0	1	0	1	0	0	0	0	0	0	0	0
3 - SURF	Junior	0	1	0	1								0	0	0	1	0	0	0	1	1	0	0	0	0	0	0	0	0	0	0	1	0	0	0	1	0	0	1	0	0	0	0	0	0	0	0	0	0
3 - SURF	Sophomore	1	0	0	1								1	1	1	1	1	1	0	1	1	0	0	0	0	0	0	0	0	0	0	0	1	1	0	1	1	1	1	0	0	0	0	0	0	0	0	0	0
3 - SURF	Sophomore	0	1	0	1								1	1	1	1	0	0	0	1	1	0	0	0	0	0	0	0	0	0	0	1	1	0	0	1	1	0	0	0	0	0	0	0	0	0	0	0	0
3 - SURF	Junior	0	1	0	1								1	1	1	1	1	1	1	1	1	0	0	0	0	0	0	0	0	0	0	1	1	0	0	1	0	0	1	0	0	0	0	0	0	0	0	0	0
3 - SURF	Junior	1	0	1	Yes	10th	Yes	0	1	0	1	0	0	0	0	1	1	1	0	1	1	0	0	0	1	0	1	0	1	1	0	1	1	1	0	1	0	0	0	0	0	1	0	1	0	1	1	0	0
3 - SURF	Sophomore	0	1	0	1								1	1	1	1	1	1	0	1	1	0	0	0	0	0	0	0	0	0	0	1	1	0	0	1	1	0	1	0	0	0	0	0	0	0	0	0	0
3 - SURF	Junior	0	1	1	Yes	10th	No	1	0	0	1	0	1	1	1	1	1	1	0	1	1	1	0	0	0	0	0	0	1	1	0	0	0	1	0	1	0	0	1	0	0	0	0	0	0	1	0	0	0
3 - SURF	Freshman	1	0	0	1								1	1	1	0	0	0	0	0	0	0	0	0	0	0	0	0	0	0	0	0	1	0	0	1	0	0	1	0	0	0	0	0	0	0	0	0	0
3 - SURF	Junior	0	1	0	1								1	0	0	0	0	1	0	0	0	0	0	0	0	0	0	0	0	0	1	0	0	1	1	0	0	0	0	0	0	0	0	0	0	0	0	0	0
3 - SURF	Junior	0	1	1	Yes	10th	Yes	1	0	1	0	0	1	0	1	1	1	1	0	1	1	1	0	1	1	1	1	0	1	1	0	0	0	0	0	0	1	1	1	0	0	0	0	0	0	0	1	0	0
3 - SURF	Junior	1	0	0	1								1	1	1	1	0	1	0	1	1	0	0	0	0	0	0	0	0	0	1	0	0	0	0	1	0	0	1	0	0	0	0	0	0	0	0	0	0
3 - SURF	Junior	1	0	1	Yes	9th	No	1	0	0	0	1	1	1	1	0	1	0	0	1	1	0	0	1	0	0	0	0	0	0	0	1	1	0	0	1	1	0	1	0	0	1	1	0	0	0	0	0	0
3 - SURF	Sophomore	1	0	0	1								0	0	0	1	0	0	0	1	1	0	0	0	0	0	0	0	0	0	0	0	0	0	0	1	1	1	1	0	0	0	0	0	0	0	0	0	0
3 - SURF	Junior	0	1	0	1								1	1	1	1	0	1	0	0	1	0	0	0	0	0	0	0	0	0	0	1	0	0	0	0	0	0	0	0	0	0	0	0	0	0	0	0	0
3 - SURF	Sophomore	1	0	0	1								1	1	1	1	1	1	0	1	1	0	0	0	0	0	0	0	0	0	0	1	0	1	0	1	0	0	1	0	0	0	0	0	0	0	0	0	0
3 - SURF	Sophomore	0	1	0	1								1	0	0	1	0	0	0	0	0	0	0	0	0	0	0	0	0	0	1	1	1	0	0	1	0	0	1	0	0	0	0	0	0	0	0	0	0
3 - SURF	Sophomore	0	1	0	1								1	1	1	1	1	1	0	1	1	0	0	0	0	0	0	0	0	0	0	0	1	0	0	1	0	0	1	0	0	0	0	0	0	0	0	0	0
3 - SURF	Junior	0	1	0	1								1	1	1	1	1	1	0	1	1	0	0	0	0	0	0	0	0	0	0	1	1	0	0	1	0	0	1	0	0	0	0	0	0	0	0	0	0
3 - SURF	Sophomore	0	1	0	1								1	1	1	1	1	1	1	1	1	0	0	0	0	0	0	0	0	0	1	1	0	0	0	1	1	1	1	0	0	0	0	0	0	0	0	0	0
3 - SURF	Sophomore	0	1	0	1								1	1	1	1	1	1	0	1	1	0	0	0	0	0	0	0	0	0	0	1	0	1	0	1	1	0	1	0	0	0	0	0	0	0	0	0	0
3 - SURF	Sophomore	0	1	0	1								1	1	1	1	1	1	0	1	1	0	0	0	0	0	0	0	0	0	1	1	1	0	0	1	0	0	1	0	0	0	0	0	0	0	0	0	0
3 - SURF	Junior	0	1	1	Yes	12th	Yes	1	0	0	1	0	1	1	1	1	1	1	0	1	1	1	0	0	1	0	1	0	1	1	0	1	1	0	0	1	1	0	1	0	0	1	0	0	0	1	1	0	1
3 - SURF	Sophomore	1	0	0	1								1	1	1	1	1	1	0	1	1	0	0	0	0	0	0	0	0	0	0	1	1	1	0	1	0	0	0	0	0	0	0	0	0	0	0	0	0
3 - SURF	Senior	1	0	0	1								1	1	1	1	1	1	0	1	1	0	0	0	0	0	0	0	0	0	0	1	0	0	0	0	1	0	1	0	0	0	0	0	0	0	0	0	0
3 - SURF	Junior	0	1	0	1								1	1	1	1	1	1	0	1	1	0	0	0	0	0	0	0	0	0	0	1	1	0	0	1	0	0	1	0	0	0	0	0	0	0	0	0	0
3 - SURF	Freshman	1	0	0	1								1	1	1	1	1	1	1	1	1	0	0	0	0	0	0	0	0	0	0	1	0	0	0	1	0	0	1	0	0	0	0	0	0	0	0	0	0
3 - SURF	Junior	1	0	0	1								1	1	1	1	1	1	0	1	1	0	0	0	0	0	0	0	0	0	0	0	1	0	0	1	0	0	1	0	0	0	0	0	0	0	0	0	0
3 - SURF	Junior	1	0	0	1								0	1	0	0	1	0	0	1	1	0	0	0	0	0	0	0	0	0	1	0	0	1	0	0	0	0	1	0	0	0	0	0	0	0	0	0	0
3 - SURF	Sophomore	1	0	0	1								0	0	0	1	1	0	0	1	1	0	0	0	0	0	0	0	0	0	0	1	0	0	0	1	1	0	1	0	0	0	0	0	0	0	0	0	0
3 - SURF	Junior	0	1	0	1								0	0	0	0	1	0	0	1	1	0	0	0	0	0	0	0	0	0	0	1	0	1	1	0	0	0	0	0	0	0	0	0	0	0	0	0	0
3 - SURF	Junior	1	0	0	1								1	1	1	1	1	1	0	1	1	0	0	0	0	0	0	0	0	0	1	1	0	0	0	1	1	1	1	0	0	0	0	0	0	0	0	0	0
3 - SURF	Junior	1	0	0	1								1	1	1	1	0	1	0	1	1	0	0	0	0	0	0	0	0	0	0	1	0	0	0	1	0	0	1	0	0	0	0	0	0	0	0	0	0
3 - SURF	Junior	0	1	0	1								1	1	1	1	1	1	0	1	1	0	0	0	0	0	0	0	0	0	0	1	1	1	0	1	1	1	1	0	0	0	0	0	0	0	0	0	0
3 - SURF	Junior	1	0	0	1								1	1	1	1	1	1	1	1	0	0	0	0	0	0	0	0	0	0	0	1	1	0	0	1	0	0	1	0	0	0	0	0	0	0	0	0	0
3 - SURF	Junior	0	1	0	1								1	0	0	1	1	0	0	0	1	0	0	0	0	0	0	0	0	0	0	1	1	0	0	1	0	0	1	0	0	0	0	0	0	0	0	0	0
3 - SURF	Junior	0	1	0	1								0	0	0	1	1	1	0	1	1	0	0	0	0	0	0	0	0	0	0	1	1	0	0	1	0	0	1	0	0	0	0	0	0	0	0	0	0
3 - SURF	Freshman	1	0	0	1								1	1	1	1	1	1	0	1	1	0	0	0	0	0	0	0	0	0	0	0	1	0	0	1	0	0	0	0	0	0	0	0	0	0	0	0	0
3 - SURF	Junior	0	1	0	1								1	1	1	1	1	0	0	1	0	0	0	0	0	0	0	0	0	0	0	0	0	1	0	0	0	0	0	0	0	0	0	0	0	0	0	0	0
3 - SURF	Sophomore	1	0	1	Yes	9th	No	0	1	0	1	0	1	1	1	1	1	1	0	1	1	1	0	0	0	1	0	0	1	0	0	1	1	0	0	1	0	0	0	0	0	0	1	0	0	0	0	0	0
3 - SURF	Junior	1	0	0	1								1	1	1	1	1	1	0	1	1	0	0	0	0	0	0	0	0	0	0	0	1	0	0	1	0	0	1	0	0	0	0	0	0	0	0	0	0
3 - SURF	Junior	0	1	0	1								1	1	1	0	0	1	1	1	1	0	0	0	0	0	0	0	0	0	0	0	1	1	0	1	0	0	1	0	0	0	0	0	0	0	0	0	0
3 - SURF	Sophomore	0	1	1	Yes	12th	Yes	1	0	0	1	0	1	1	1	1	1	1	1	1	1	1	0	0	1	0	0	0	0	0	0	1	0	0	0	1	0	1	1	0	0	0	0	0	0	0	0	1	0
3 - SURF	Junior	0	1	0	1								1	0	0	1	1	0	0	0	1	0	0	0	0	0	0	0	0	0	0	1	1	0	0	1	1	0	1	0	0	0	0	0	0	0	0	0	0
3 - SURF	Senior	1	0	0	1								0	0	0	1	1	1	0	1	1	0	0	0	0	0	0	0	0	0	0	0	1	1	1	1	1	1	1	0	0	0	0	0	0	0	0	0	0
4 - HS	10th	1	0	1	0	n.ask	n.ask	1	0	0	0	1	1	1	1	1	1	1	1	1	1	1	1	0	1	0	0	0	1	0	0	1	1	0	0	1	0	0	1	0	0	0	1	0	0	0	0	0	0
4 - HS	9th	0	1	1	0	n.ask	n.ask	1	0	0	0	1	0	0	0	1	0	0	0	1	1	0	0	0	1	0	0	0	0	0	0	0	1	0	0	0	0	0	0	0	0	0	0	1	0	0	1	0	0
4 - HS	10th	1	0	1	0	n.ask	n.ask	1	0	0	0	1	1	0	0	1	0	1	0	1	1	1	0	0	0	0	0	0	0	0	0	0	0	0	0	1	0	0	1	0	0	0	0	0	0	1	0	0	1
4 - HS	9th	0	1	1	0	n.ask	n.ask	1	0	0	1	0	1	0	0	1	0	1	0	1	1	1	0	0	1	0	0	0	1	0	0	0	1	1	0	1	1	1	1	0	0	0	0	0	0	0	1	1	0
4 - HS	11th	0	1	1	0	n.ask	n.ask	0	1	0	0	1	1	0	0	0	0	1	1	0	0	0	0	0	0	0	1	0	0	0	1	1	1	0	0	1	1	0	1	0	1	1	1	1	0	1	0	0	1
4 - HS	10th	1	0	1	0	n.ask	n.ask	0	1	0	0	1	1	1	0	1	0	1	0	1	1	1	1	0	1	0	1	0	1	1	0	0	0	0	0	1	0	0	1	0	0	0	0	0	0	1	0	0	1
4 - HS	10th	0	1	1	0	n.ask	n.ask	1	0	0	0	1	1	1	1	1	1	1	1	1	1	1	0	0	1	0	0	0	1	0	1	1	1	0	0	0	1	0	1	0	0	1	0	0	0	0	0	0	1
4 - HS	10th	1	0	1	0	n.ask	n.ask	0	1	0	0	1	1	0	1	1	0	1	0	1	1	1	0	0	1	0	0	0	1	1	1	1	0	0	0	0	1	0	1	0	0	1	0	0	0	0	1	0	0
4 - HS	10th	0	1	1	0	n.ask	n.ask	1	0	0	0	1	1	1	1	1	1	1	1	1	1	1	1	0	0	0	0	0	0	0	1	1	1	0	0	1	1	0	1	0	0	1	0	0	0	0	0	0	0
4 - HS	10th	1	0	1	0	n.ask	n.ask	1	0	0	0	1	1	0	0	1	0	1	0	1	1	1	0	0	0	0	1	0	1	1	0	0	1	0	0	1	0	0	1	0	0	0	1	0	0	0	0	0	1
4 - HS	9th	1	0	1	0	n.ask	n.ask	1	0	0	1	0	1	0	0	1	0	1	0	1	1	1	0	0	0	0	1	0	1	0	0	1	0	0	0	1	0	0	1	0	0	1	0	0	0	1	0	0	1
4 - HS	9th	0	1	1	0	n.ask	n.ask	0	1	0	1	0	1	1	1	1	1	1	0	1	1	1	0	1	1	0	1	0	1	1	0	0	1	0	0	1	0	0	1	0	0	0	0	0	0	0	0	0	1
4 - HS	10th	0	1	1	0	n.ask	n.ask	1	0	0	1	0	1	0	0	1	0	0	0	1	1	1	0	0	0	0	0	0	0	0	0	0	0	0	0	0	0	0	1	0	0	0	0	0	0	0	0	0	1
4 - HS	10th	0	1	1	0	n.ask	n.ask	1	0	0	0	1	0	0	0	1	0	1	0	1	1	0	0	0	1	0	0	0	1	0	0	0	0	0	0	1	0	0	1	0	0	0	0	0	0	0	0	0	1
4 - HS	12th	0	1	1	0	n.ask	n.ask	1	0	0	1	0	0	0	0	1	0	1	0	1	1	0	0	0	1	0	1	0	0	1	1	1	0	0	0	1	1	1	1	0	1	1	0	0	0	1	1	1	0
4 - HS	10th	1	0	1	0	n.ask	n.ask	1	0	0	1	0	1	1	0	1	1	1	0	1	1	0	0	0	0	0	0	0	0	0	1	0	0	0	0	1	0	0	0	0	0	1	0	1	0	1	0	0	0
4 - HS	10th	1	0	1	0	n.ask	n.ask	1	0	0	0	1	1	1	1	1	1	1	0	1	1	1	0	0	0	0	0	0	1	0	0	1	1	1	0	0	0	1	0	0	0	1	1	0	0	0	0	1	0
4 - HS	10th	1	0	1	0	n.ask	n.ask	0	1	0	0	1	1	1	1	1	1	1	0	1	1	1	0	0	1	0	1	0	1	0	0	1	1	0	0	1	0	0	1	0	0	1	1	0	0	0	0	0	0
4 - HS	10th	1	0	1	0	n.ask	n.ask	0	1	0	1	0	1	1	1	1	1	0	0	1	1	0	0	0	1	1	0	0	1	0	0	1	1	0	0	1	1	1	1	0	0	1	0	0	0	0	1	1	0
4 - HS	12th	0	1	1	0	n.ask	n.ask	1	0	0	1	0	1	1	1	1	1	1	0	1	1	1	0	0	0	0	1	0	1	1	1	0	1	1	0	1	1	1	1	0	0	0	1	1	0	1	0	0	0
4 - HS	9th	1	0	1	0	n.ask	n.ask	1	0	0	1	0	0	0	0	1	0	1	1	1	1	0	0	0	1	0	0	0	1	0	0	0	0	1	0	1	1	0	1	0	0	0	0	0	0	1	1	0	1
4 - HS	10th	0	1	1	0	n.ask	n.ask	1	0	0	0	1	1	0	0	1	0	1	0	0	0	1	0	0	0	0	0	0	0	0	0	0	1	0	1	0	0	0	1	0	0	0	1	0	0	0	1	0	1
4 - HS	10th	1	0	1	0	n.ask	n.ask	0	1	0	1	0	1	1	1	1	0	1	1	1	1	1	0	0	1	0	0	0	1	0	0	1	1	0	0	1	0	0	1	0	0	0	0	0	0	0	0	0	0
4 - HS	10th	0	1	1	0	n.ask	n.ask	1	0	0	0	1	1	1	0	1	1	1	0	0	0	1	0	0	1	1	0	0	0	0	0	0	0	0	0	1	0	0	0	0	0	0	0	0	0	1	0	0	0
4 - HS	10th	0	1	1	0	n.ask	n.ask	0	1	0	0	1	1	1	1	1	1	1	1	1	1	1	0	0	1	1	0	0	1	1	0	1	0	0	0	1	0	0	1	0	0	1	0	0	0	1	0	0	1
4 - HS	9th	1	0	1	0	n.ask	n.ask	1	0	0	0	1	0	0	0	1	1	0	0	0	0	1	0	0	1	0	0	0	0	0	0	0	0	0	0	1	0	0	1	0	0	0	0	0	0	1	0	0	1
4 - HS	10th	1	0	1	0	n.ask	n.ask	0	1	0	0	1	1	1	1	1	1	1	1	1	1	1	0	0	1	1	1	0	0	1	0	1	0	0	0	0	1	0	1	0	0	0	0	0	0	0	0	0	1
4 - HS	10th	0	1	1	0	n.ask	n.ask	1	0	1	0	0	1	1	1	1	1	1	0	1	1	1	0	0	1	1	0	0	1	1	0	0	0	1	0	1	1	1	1	0	0	0	0	0	0	1	1	1	1
4 - HS	10th	1	0	1	0	n.ask	n.ask	1	0	0	0	1	1	1	1	1	1	1	0	1	1	1	0	0	1	0	0	0	1	0	0	1	1	1	0	1	0	0	1	0	0	1	1	1	0	0	0	0	0
4 - HS	10th	0	1	1	0	n.ask	n.ask	1	0	0	0	1	1	1	1	1	1	1	0	1	1	1	0	0	1	0	1	0	0	1	0	0	1	0	0	1	1	0	1	0	0	0	0	0	0	0	0	0	1
4 - HS	9th	1	0	1	0	n.ask	n.ask	1	0	0	1	0	1	0	0	1	0	1	0	1	1	1	0	0	1	0	0	0	1	0	0	0	1	0	0	1	1	0	1	0	0	0	1	0	0	0	1	0	1
4 - HS	10th	1	0	1	0	n.ask	n.ask	1	0	0	0	1	1	1	1	1	0	1	0	1	1	0	1	1	0	0	0	0	1	0	0	0	1	0	0	1	1	1	1	0	0	0	1	0	0	1	1	1	1
4 - HS	10th	0	1	1	0	n.ask	n.ask	1	0	0	1	0	1	1	1	1	1	1	0	1	1	0	0	0	0	0	0	0	0	0	0	0	1	0	0	0	0	0	0	0	0	0	1	0	0	0	0	0	0
4 - HS	10th	1	0	1	0	n.ask	n.ask	1	0	0	0	1	1	0	0	1	1	1	0	1	1	1	1	0	1	0	1	0	1	1	0	0	1	1	0	0	0	0	0	0	1	0	1	1	0	0	0	0	0
4 - HS	9th	0	1	1	0	n.ask	n.ask	1	0	0	1	0	0	1	0	1	0	1	0	1	1	0	0	0	1	0	0	0	1	1	0	0	0	0	0	1	0	0	1	0	0	0	0	0	0	1	0	0	0
4 - HS	11th	0	1	1	0	n.ask	n.ask	1	0	0	1	0	1	1	1	1	1	1	0	1	1	1	0	0	1	0	1	0	0	0	0	0	1	1	0	0	0	0	1	0	0	1	0	1	0	1	1	0	1
4 - HS	10th	1	0	1	0	n.ask	n.ask	1	0	0	0	1	1	0	1	0	0	0	0	1	1	1	0	1	0	0	0	0	1	1	0	1	0	0	0	0	0	0	1	0	0	1	0	0	0	0	0	0	0
4 - HS	10th	1	0	1	0	n.ask	n.ask	1	0	0	1	0	1	1	1	1	1	1	1	1	1	1	0	0	1	0	0	0	1	1	0	1	1	0	0	0	0	0	1	0	0	1	0	1	0	1	0	0	1
4 - HS	10th	0	1	1	0	n.ask	n.ask	0	1	0	0	1	1	1	1	1	1	0	0	1	1	1	0	0	1	0	0	0	1	1	0	0	1	1	0	1	1	0	1	0	0	0	0	1	0	0	0	0	0
4 - HS	10th	1	0	1	0	n.ask	n.ask	1	0	0	0	1	0	0	0	1	0	0	0	1	1	0	0	0	1	0	0	0	1	1	0	0	1	0	0	0	0	0	1	0	0	0	0	0	0	0	0	0	1
4 - HS	10th	1	0	1	0	n.ask	n.ask	1	0	1	0	0	1	1	1	1	1	1	0	1	1	1	0	0	1	0	0	0	1	1	0	1	0	0	0	1	0	0	1	0	0	1	0	0	0	1	0	0	1
4 - HS	10th	1	0	1	0	n.ask	n.ask	0	1	0	1	0	1	1	1	1	1	0	0	0	1	1	0	0	1	1	0	0	1	0	1	1	0	0	0	0	1	1	0	0	1	0	0	1	0	0	1	1	0
4 - HS	9th	1	0	1	0	n.ask	n.ask	1	0	0	1	0	1	0	0	1	0	1	0	0	1	1	0	0	0	0	0	0	0	0	0	0	1	1	0	1	0	1	1	0	0	0	1	1	0	1	0	1	1
4 - HS	11th	0	1	1	0	n.ask	n.ask	0	1	0	1	0	0	0	0	0	0	0	0	1	1	0	1	0	0	0	0	0	0	0	0	0	0	0	0	1	0	0	0	0	0	0	0	0	0	0	0	0	0
4 - HS	10th	0	1	1	0	n.ask	n.ask	1	0	0	1	0	1	1	1	0	0	1	0	0	0	0	0	0	0	0	1	0	0	0	1	0	0	0	0	0	0	0	0	0	0	0	0	0	0	1	0	0	0
4 - HS	10th	0	1	1	0	n.ask	n.ask	1	0	0	0	1	1	0	0	1	0	1	0	1	1	0	0	0	0	0	0	0	0	0	0	1	1	0	0	0	0	0	1	0	0	0	0	0	0	0	0	0	0
4 - HS	11th	1	0	1	0	n.ask	n.ask	0	1	0	1	0	0	1	0	1	1	1	0	1	1	0	0	0	0	0	1	0	1	1	0	1	0	0	0	1	0	0	1	0	0	1	0	0	0	0	0	0	1
4 - HS	10th	1	0	1	0	n.ask	n.ask	1	0	0	0	1	1	1	1	1	1	1	1	1	1	1	0	0	1	0	0	0	0	0	0	0	0	0	0	1	0	0	1	0	0	1	0	0	0	1	0	0	1
4 - HS	10th	1	0	1	0	n.ask	n.ask	0	1	0	1	0	1	1	1	1	1	1	1	1	1	1	0	0	1	0	0	0	1	0	0	0	1	0	0	0	1	0	1	0	0	0	1	0	0	0	1	0	0
4 - HS	9th	0	1	1	0	n.ask	n.ask	1	0	0	1	0	1	1	1	1	0	1	0	1	1	1	0	0	0	0	0	0	1	1	0	1	0	1	0	1	0	1	1	0	0	1	0	1	0	1	0	1	1
4 - HS	10th	0	1	1	0	n.ask	Yes	1	0	0	1	0	1	1	1	0	0	0	0	0	0	1	1	0	0	0	0	0	0	0	0	1	0	0	0	1	0	0	1	0	0	1	0	0	0	1	0	0	1
4 - HS	9th	1	0	1	0	n.ask	No	1	0	0	1	0	1	1	1	1	1	1	0	1	1	1	0	0	0	0	0	0	1	1	0	0	0	0	0	0	0	0	1	0	0	0	0	0	0	0	0	0	1
4 - HS	10th	0	1	1	0	n.ask	Yes	1	0	1	0	0	1	1	0	1	1	1	0	1	1	1	0	0	1	1	1	0	1	1	0	1	1	0	0	1	1	0	1	0	0	1	1	0	0	1	1	0	1
4 - HS	10th	0	1	1	0	n.ask	Yes	0	1	0	0	1	1	0	0	1	0	1	0	1	1	0	0	0	1	0	0	0	1	1	0	0	1	1	0	1	0	0	1	0	0	0	1	0	0	0	0	0	1
4 - HS	12th	0	1	1	0	n.ask	Yes	1	0	0	1	0	1	1	0	1	0	0	0	0	0	0	1	0	0	0	0	0	0	0	0	0	1	0	0	1	0	0	1	0	0	0	0	0	0	0	0	0	1
4 - HS	10th	0	1	1	0	n.ask	Yes	0	1	0	0	1	1	0	0	1	0	1	0	1	1	1	0	0	1	0	0	0	1	1	0	0	0	0	0	1	1	0	1	0	0	0	0	0	0	1	1	0	0
4 - HS	10th	0	1	1	0	n.ask	No	1	0	0	1	0	1	1	1	1	1	0	0	1	1	0	0	0	0	0	0	0	1	1	0	0	1	0	0	1	0	0	1	0	0	0	0	0	0	1	0	0	1
4 - HS	9th	1	0	1	0	n.ask	No	0	1	1	0	0	1	1	1	1	0	1	1	1	1	1	0	0	0	0	0	0	1	0	0	1	1	0	0	1	1	0	1	0	0	1	0	0	0	1	1	0	1
4 - HS	9th	1	0	1	0	n.ask	No	0	1	1	0	0	1	1	1	1	0	1	1	1	1	1	0	0	0	0	0	0	1	0	0	1	1	0	0	1	1	0	1	0	0	1	0	0	0	1	1	0	1
4 - HS	9th	0	1	1	0	n.ask	Yes	1	0	0	1	0	1	0	1	1	0	1	0	0	0	0	0	1	0	0	0	0	0	0	0	0	0	0	0	1	0	0	1	0	0	0	0	0	0	1	0	0	1
4 - HS	9th	1	0	1	0	n.ask	Yes	1	0	0	1	0	1	0	0	1	0	1	0	1	1	1	0	0	0	0	0	0	1	1	0	0	0	1	0	1	0	0	1	0	0	0	0	1	0	1	0	0	1
4 - HS	10th	0	1	1	0	n.ask	No	1	0	0	1	0	1	1	1	1	1	1	0	1	1	1	1	0	0	0	0	0	1	0	0	1	1	0	0	1	1	0	1	0	0	0	1	0	0	1	1	0	1
4 - HS	10th			1	0	n.ask	No	1	0	0	1	0	0	0	0	0	0	1	0	1	1	0	0	0	0	0	1	0	1	1	0	0	0	0	0	0	0	0	0	0	0	0	0	0	0	0	0	0	0
4 - HS	11th	0	1	1	0	n.ask	Yes	1	0	0	1	0	1	1	0	1	0	1	1	0	0	1	0	0	0	0	0	0	0	0	0	0	0	0	0	0	0	0	1	0	0	0	0	0	0	0	0	0	1
4 - HS	9th	1	0	1	0	n.ask	Yes	1	0	0	1	0	1	1	1	1	0	1	0	1	1	1	1	0	1	0	1	0	1	1	1	1	0	0	0	1	0	1	1	0	0	1	1	1	0	1	1	1	1
[truncated: 57 more columns]
